# Supplementary material for: Structure-Function Elucidation of a New α-Conotoxin, MilIA, from Conus milneedwardsi
Source: PubMed Central journal article supplement (PMC6780063; doi:10.3390/md17090535), 2019-09-16
Supplement: marinedrugs-17-00535-s001.pdf [file marinedrugs-17-00535-s001.pdf]

**Table S1.** Hill coefficient values for the obtained concentration-response curves.

| Hill Coefficient                          | $\alpha 1\beta 1\delta \epsilon$<br>(nM) | $\alpha 1\beta 1\gamma \delta$<br>(nM) | $\alpha 9\alpha 10$<br>(nM) |
|-------------------------------------------|------------------------------------------|----------------------------------------|-----------------------------|
| MiIIA                                     | $1.2 \pm 0.1$                            | $0.7 \pm 0.1$                          | /                           |
| MiIIA[M9G]                                | /                                        | $1.0 \pm 0.1$                          | /                           |
| MiIIA[N10K]                               | /                                        | $0.8 \pm 0.1$                          | /                           |
| MiIIA[ $\Delta 1, M2R$ ]                  | $0.75 \pm 0.1$                           | $0.7 \pm 0.1$                          | /                           |
| MiIIA[ $\Delta 1, M2R, M9G, N10K, H11K$ ] | $0.9 \pm 0.3$                            | $1.4 \pm 0.4$                          | $1.03 \pm 0.3$              |
| MiIIA[M9G, N10K]                          | $1.7 \pm 0.1$                            | $1.8 \pm 0.4$                          | /                           |

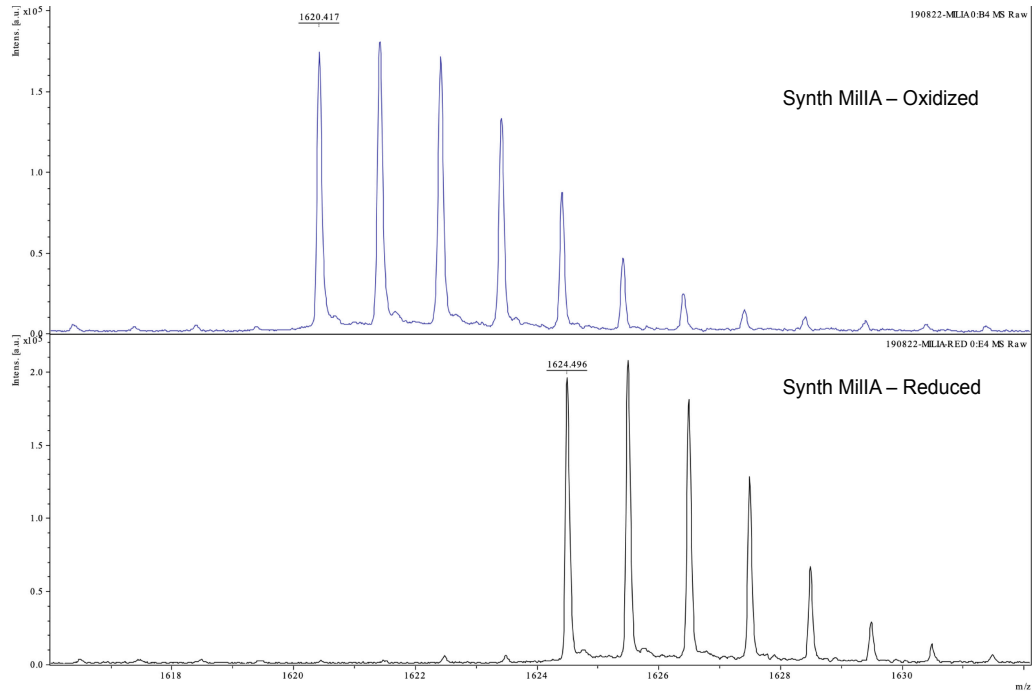

**Figure S1.** MALDI-TOF analysis of synthetic MiIIA.

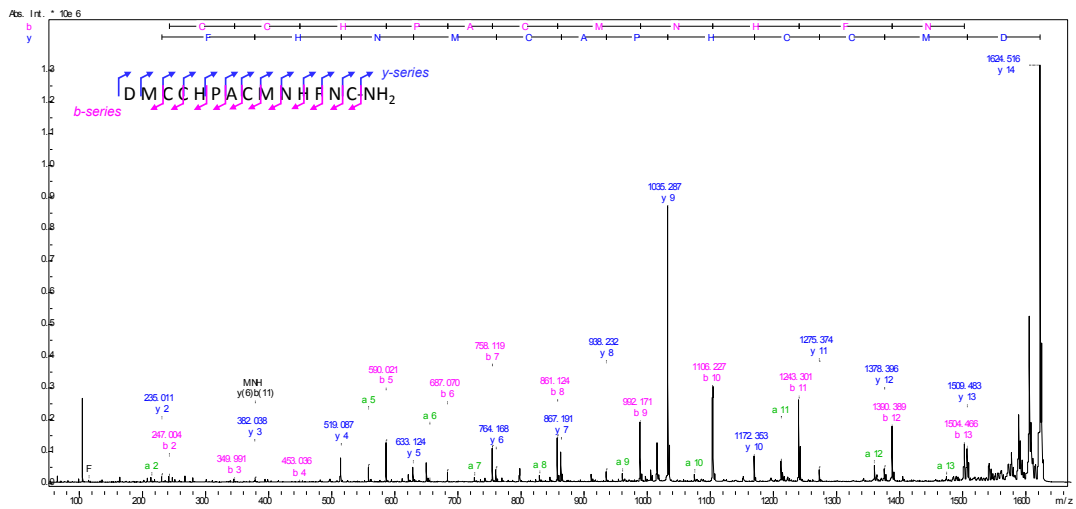

**Figure S2.** Sequence verification of synthetic reduced MiIIA.
